# Supplementary material
Source: bioRxiv or medRxiv preprint supplement (https://www.biorxiv.org/highwire/filestream/99222/field_highwire_adjunct_files/6/323576-7.pdf)
Supplement: Supplementary file [file 323576-7.pdf]

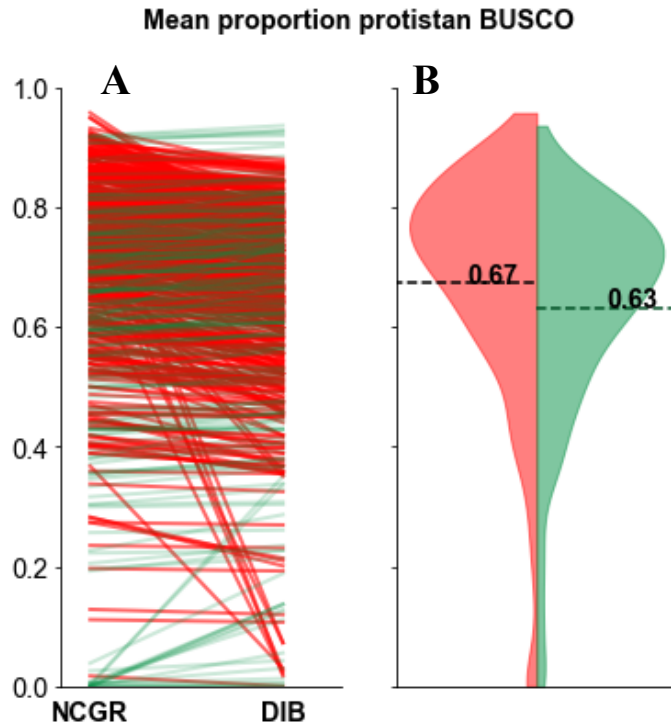

Supplemental Figure 3. The mean proportion of contigs with complete protistan universal single-copy orthologs (BUSCO) recovered in each assembly. (A) Line plots compare values between the DIB and the NCGR ‘nt’ assemblies. Red lines represent values where NCGR ‘nt’ assemblies were higher than the DIB re-assemblies and green lines represent values where the DIB re-assemblies were higher than the NCGR ‘nt’ assemblies. (B) Split violin plots show the distribution of protistan BUSCO scores for each, in the green (right side) are the “DIB” re-assemblies and in red are the original assemblies from NCGR ‘nt’ assemblies.
